# Supplementary material for: Perturbation-based balance training of older adults and effects on physiological, cognitive and sociopsychological factors: a secondary analysis from a randomised controlled trial with 12-month follow-up
Source: HighWire-hosted journal article supplement (doi:10.1136/bmjopen-2023-080550), 2024-08-01
Supplement: bmjopen-2023-080550supp002_data_supplement.pdf [file bmjopen-2023-080550supp002_data_supplement.pdf]

SUPPLEMENTARY MATERIAL 2: MISSING DATA

TABLE OF CONTENT

MISSING DATA..... 2

MISSING DATA

| Table SM3.1 – Missing data for each outcome |              |               |                   |                    |               |               |                   |                    |
|---------------------------------------------|--------------|---------------|-------------------|--------------------|---------------|---------------|-------------------|--------------------|
| Outcome                                     | PBT group    |               |                   |                    | Control group |               |                   |                    |
|                                             | Pre-training | Post-training | 6-month follow-up | 12-month follow-up | Pre-training  | Post-training | 6-month follow-up | 12-month follow-up |
| Gait                                        | 0 (0)        | 4 (6)         | 6 (9%)            | 10 (14%)           | 0 (0)         | 3 (4%)        | 11 (16%)          | 16 (23%)           |
| Balance                                     | 0 (0)        | 4 (6)         | 6 (9%)            | 10 (14%)           | 0 (0)         | 3 (4%)        | 11 (16%)          | 16 (23%)           |
| Reaction                                    | 0 (0)        | 4 (6)         | 6 (9%)            | 10 (14%)           | 0 (0)         | 3 (4%)        | 11 (16%)          | 16 (23%)           |
| SPPB                                        | 0 (0)        | 4 (6)         | 6 (9%)            | 10 (14%)           | 0 (0)         | 3 (4%)        | 11 (16%)          | 16 (23%)           |
| TMT                                         | 0 (0)        | 4 (6)         | 6 (9%)            | 10 (14%)           | 0 (0)         | 3 (4%)        | 10 (14%)          | 16 (23%)           |
| FES                                         | 0 (0)        | 4 (6)         | 6 (9%)            | 10 (14%)           | 0 (0)         | 3 (4%)        | 10 (14%)          | 16 (23%)           |
| EQ5D                                        | 0 (0)        | 4 (6)         | 6 (9%)            | 10 (14%)           | 0 (0)         | 3 (4%)        | 10 (14%)          | 16 (23%)           |

| Table SM3.2 – Summary of reasons for missing data in each group |                   |                        |
|-----------------------------------------------------------------|-------------------|------------------------|
| Reason                                                          | PBT group (n =13) | Control group (n = 18) |
| Injury/illness                                                  | 6                 | 9                      |
| Personal reasons*                                               | 7                 | 9                      |

\*Personal reasons include logistical issues, lack of motivation, and changes in personal relations forcing stoppage in participation

**Table SM3.3 – Baseline characteristics of participants with at least one missing data point in each group**

|                                                           | PBT group<br>(n = 13)  | Control group<br>(n = 18) | p-values                |
|-----------------------------------------------------------|------------------------|---------------------------|-------------------------|
| Age (years),<br>Mean (SD)                                 | 73 (5.0)               | 72 (5)                    | 0.66 <sup>α</sup>       |
| Sex,<br>no. female (%)                                    | 9 (69)                 | 9 (50)                    | 0.46 <sup>γ</sup>       |
| Frailty*,<br>median (IQR)                                 | 3 (2-4)                | 2 (1-3)                   | 0.13 <sup>β</sup>       |
| Medication,<br>median (IQR)                               | 4 (2-7)                | 2 (0-4)                   | 0.19 <sup>β</sup>       |
| Function of daily activities*, median (IQR)               | 2 (2-3)                | 2 (1-3)                   | 0.45 <sup>β</sup>       |
| Previous fallers,<br>No. fallen (%)                       | 6 (46)                 | 6 (33)                    | 0.71 <sup>γ</sup>       |
| Fear of falling,<br>Median (IQR)                          | 7 (7-8)                | 8 (7-9)                   | 0.57 <sup>β</sup>       |
| Cognition*,<br>median (IQR)                               | 24 (24-26)             | 26 (24-26)                | 0.32 <sup>β</sup>       |
| Physical function*,<br>Median (IQR)                       | 11 (11-12)             | 12 (11-12)                | 0.45 <sup>β</sup>       |
| Habitual gait speed (m/s),<br>Mean (SD)                   | 1.2 (0.1)              | 1.3 (0.2)                 | 0.12 <sup>α</sup>       |
| Dual-task gait speed (m/s)<br>Mean (SD)                   | 1.0 (0.2)              | 1.2 (0.2)                 | <b>0.03<sup>α</sup></b> |
| Single-task balance,<br>sway speed (mm/s)<br>Median (IQR) | 13.83<br>(10.97-19.03) | 15.60<br>(12.00-25.67)    | 0.37 <sup>β</sup>       |
| Dual-task balance,<br>sway speed (mm/s)<br>Median (IQR)   | 20.30<br>(15.78-25.93) | 23.67<br>(15.77-25.93)    | 0.19 <sup>β</sup>       |
| Reaction time (ms),<br>Mean (SD)                          | 904 (148)              | 959 (128)                 | 0.86 <sup>α</sup>       |
| Executive function <sup>©</sup> (s),<br>median (IQR)      | 59.18<br>(51.73-63.78) | 45.93<br>(28.83-78.88)    | 0.12 <sup>β</sup>       |

\* Tilburg Frailty indicator; \* The Vulnerable Elderly-13 Survey; \* The Short Orientation-Memory-Concentration Test; \* The Short Physical Performance Battery; © Trail Making Test Part A subtracted from Part B; bold text indicates significant group differences. <sup>α</sup> Unpaired sample t-test; <sup>β</sup> Wilcoxon signed rank test; <sup>γ</sup> Fisher's exact test; bold text indicates significant between group differences

**Table SM3.4 – Baseline characteristics of participants with at least one missing data point compared to participants with no missing data**

|                                                           | With missing<br>(n = 31) | Without missing<br>(n = 109) | p-values          |
|-----------------------------------------------------------|--------------------------|------------------------------|-------------------|
| Age (years),<br>Mean (SD)                                 | 72 (5.1)                 | 72 (4.6)                     | 0.52 <sup>α</sup> |
| Sex,<br>no. female (%)                                    | 18 (58)                  | 61 (56)                      | 1.0 <sup>γ</sup>  |
| Frailty*,<br>median (IQR)                                 | 2 (1-3)                  | 1 (1-3)                      | 0.07 <sup>β</sup> |
| Medication,<br>median (IQR)                               | 3 (1-5)                  | 2 (0-4)                      | 0.25 <sup>β</sup> |
| Function of daily activities*,<br>median (IQR)            | 2 (1-2)                  | 2 (1-3)                      | 0.55 <sup>β</sup> |
| Previous fallers,<br>No. fallen (%)                       | 12 (39)                  | 45 (41)                      | 0.84 <sup>γ</sup> |
| Fear of falling,<br>Median (IQR)                          | 8 (7-9)                  | 7 (7-8)                      | 0.57 <sup>β</sup> |
| Cognition*,<br>median (IQR)                               | 26 (24-26)               | 26 (24-28)                   | 0.12 <sup>β</sup> |
| Physical function*,<br>Median (IQR)                       | 12 (11-12)               | 12 (11-12)                   | 0.28 <sup>β</sup> |
| Habitual gait speed (m/s),<br>Mean (SD)                   | 1.3 (0.2)                | 1.3 (0.2)                    | 0.25 <sup>α</sup> |
| Dual-task gait speed (m/s)<br>Mean (SD)                   | 1.1 (0.2)                | 1.1 (0.2)                    | 0.47 <sup>α</sup> |
| Single-task balance,<br>sway speed (mm/s)<br>Median (IQR) | 14.3<br>(11.7-20.7)      | 14.9<br>(12.0-19.2)          | 0.89 <sup>β</sup> |
| Dual-task balance,<br>sway speed (mm/s)<br>Median (IQR)   | 21.8<br>(14.4-27.3)      | 18.0<br>(14.9-25.1)          | 0.25 <sup>β</sup> |
| Reaction time (ms),<br>Mean (SD)                          | 927 (140)                | 889 (108)                    | 0.95 <sup>α</sup> |
| Executive function <sup>©</sup> (s),<br>median (IQR)      | 54.8<br>(36.3-74.2)      | 37.5<br>(25.5-58.4)          | 0.06 <sup>β</sup> |

\* Tilburg Frailty indicator; \* The Vulnerable Elderly-13 Survey; \* The Short Orientation-Memory-Concentration Test; \* The Short Physical Performance Battery; © Trail Making Test Part A subtracted from Part B; bold text indicates significant group differences. <sup>α</sup> Unpaired sample t-test; <sup>β</sup> Wilcoxon signed rank test; <sup>γ</sup> Fisher's exact test; bold text indicates significant between group differences
